# Supplementary material
Source: publisher figshare collection journal article supplement (https://frontiersin.figshare.com/ndownloader/files/14905778)
Supplement: Supplementary file [file 14905778]

**Supplemental Table 1. Primers used for qRT-PCR.**

| <b>Mouse</b>  |                                          |
|---------------|------------------------------------------|
| <i>Glut1</i>  | Forward: 5'-CAGTTCGGCTATAACACTGGTG-3'    |
|               | Reverse: 5'-GCCCCCGACAGAGAAGAT G-3'      |
| <i>Glut3</i>  | Forward: 5'-GCTTTGGCAGACGCAACTCT-3'      |
|               | Reverse: 5'-TAGTGTGCCAAATGCACCCC-3'      |
| <i>Glut6</i>  | Forward: 5'-CTCTACGCCCTTGGTCTGC-3'       |
|               | Reverse: 5'-ATCATGATGAGAACCGGCC-3'       |
| <i>Ldha</i>   | Forward: 5'-CATTGTCAAGTACAGTCCACA CT-3'  |
|               | Reverse: 5'-TTCCAATTACTCGGTTTTTGGGA-3'   |
| <i>Ldhb</i>   | Forward: 5'-GATTCCGCTACCTCATGGCA-3'      |
|               | Reverse: 5'-ATGCCGTACATTCCCTGTCC-3'      |
| <i>Hk1</i>    | Forward: 5'-TTCGAGAAGATGGTGAGCGG-3'      |
|               | Reverse: 5'-GGAGAGTTCCCATCCCGTTT-3'      |
| <i>Hk2</i>    | Forward: 5'-TGATCGCTGCTTATTCACGG-3'      |
|               | Reverse: 5'-AACCGCCTAGAA ATCTCCAGA-3'    |
| <i>Cpt1-b</i> | Forward: 5'-CGTTCCTGTACCAACGAGTC-3'      |
|               | Reverse: 5'-CAGAAAGTACCTCAGCCAGG-3'      |
| <i>Pkm</i>    | Forward: 5'-GCCGCCTGGACATTGACTC-3'       |
|               | Reverse: 5'-CCATGAGAGAAATTCAGGCGAG-3'    |
| <i>Gls2</i>   | Forward: 5'-AGCGTATCCCTATCCACAAGTTCA-3'  |
|               | Reverse: 5'-GACGTCCAGTGGCCTTCAGAG-3'     |
| <i>Cpt1a</i>  | Forward: 5'-CCAGGCTACAGTGGGACATT-3'      |
|               | Reverse: 5'-GAACTTGCCCATGTCCTTGT-3'      |
| <i>G6pdx</i>  | Forward: 5'-CACAGTGGACGACATCCG AAA-3'    |
|               | Reverse: 5'-AGCTACATAGGA ATTACGGGC AA-3' |
| <i>Rpe</i>    | Forward: 5'-GAAGTGTGCGGAGGCAG-3'         |
|               | Reverse: 5'-TTTAATCACTGGAATGCAGCAC-3'    |
| <i>Cpt2</i>   | Forward: 5'-ACCATGCACTACCAGGACAG-3'      |
|               | Reverse: 5'-TATCAAACCAGGGGCCTGAGA-3'     |
| <i>Odc</i>    | Forward: 5'-GACGAGTTTGACTGCCACATC-3'     |
|               | Reverse: 5'-CGCAACATAGAACGCATCCTT-3'     |
| <i>Pgd</i>    | Forward: 5'-CGTAAGGCCCTCTATGCTTC-3'      |
|               | Reverse: 5'-TGAAGTTCTGGGTTTCGCTC-3'      |
| <i>Gapdh</i>  | Forward: 5'-GAAACTGGGAAGGGGAGTGG-3'      |
|               | Reverse: 5'-GCCAAATCCGTTACACCCG-3'       |
| <i>Ppia</i>   | Forward: 5'-GCTGTTTGCAGACAAAGTTCCA-3'    |
|               | Reverse: 5'-CGTGTAAGTCACCACCCTGG-3'      |
|               |                                          |

| Human        |                                        |
|--------------|----------------------------------------|
| <i>GLUT1</i> | Forward: 5'-TTGGCTCCGGTATCGTCAAC-3'    |
|              | Reverse: 5'-CTCCACCACAAACAGCGACA-3'    |
| <i>GLUT3</i> | Forward: 5'-GTCATGATCCCAGCGAGACC-3'    |
|              | Reverse: 5'-CTGGGGTGACCTTCTGTGTC-3'    |
| <i>GLUT6</i> | Forward: 5'-CCATGCTCTTCATCATGGGCTAC-3' |
|              | Reverse: 5'-CACTGGCAGGAAGGACTTGG-3'    |
| <i>LDHA</i>  | Forward: 5'-TGGAGATTCCAGTGTGCCTG-3'    |
|              | Reverse: 5'-CCTGCTTGTGAACCTCTTTCC-3'   |
| <i>LDHB</i>  | Forward: 5'-GGAGAGTCGGCTCAATCTGG-3'    |
|              | Reverse: 5'-AGAATGTCCACTGGGTTGGA-3'    |
| <i>HK1</i>   | Forward: 5'-TAAAGCGAGCGGAGTGGAAG-3'    |
|              | Reverse: 5'-ACAGTGCTGGTCGTCATAGC-3'    |
| <i>HK2</i>   | Forward: 5'-ATTGCCGAATGCCTGGCTAA-3'    |
|              | Reverse: 5'-CAAAGTCCCCTCTCCTCTGGA-3'   |
| <i>PKM</i>   | Forward: 5'-ATCTGCACAACCTGTGACCG-3'    |
|              | Reverse: 5'-ATAAACACCCGACGCTTGGT-3'    |
| <i>GAPDH</i> | Forward: 5'-GCAAATTCCATGGCACCGTC-3'    |
|              | Reverse: 5'-AAATGAGCCCCAGCCTTCTC-3'    |
| <i>PPIA</i>  | Forward: 5'-AGCTGTTTACCCCTGATCGTG-3'   |
|              | Reverse: 5'-CCTTGTCTGCAAACAGAAGGC-3'   |

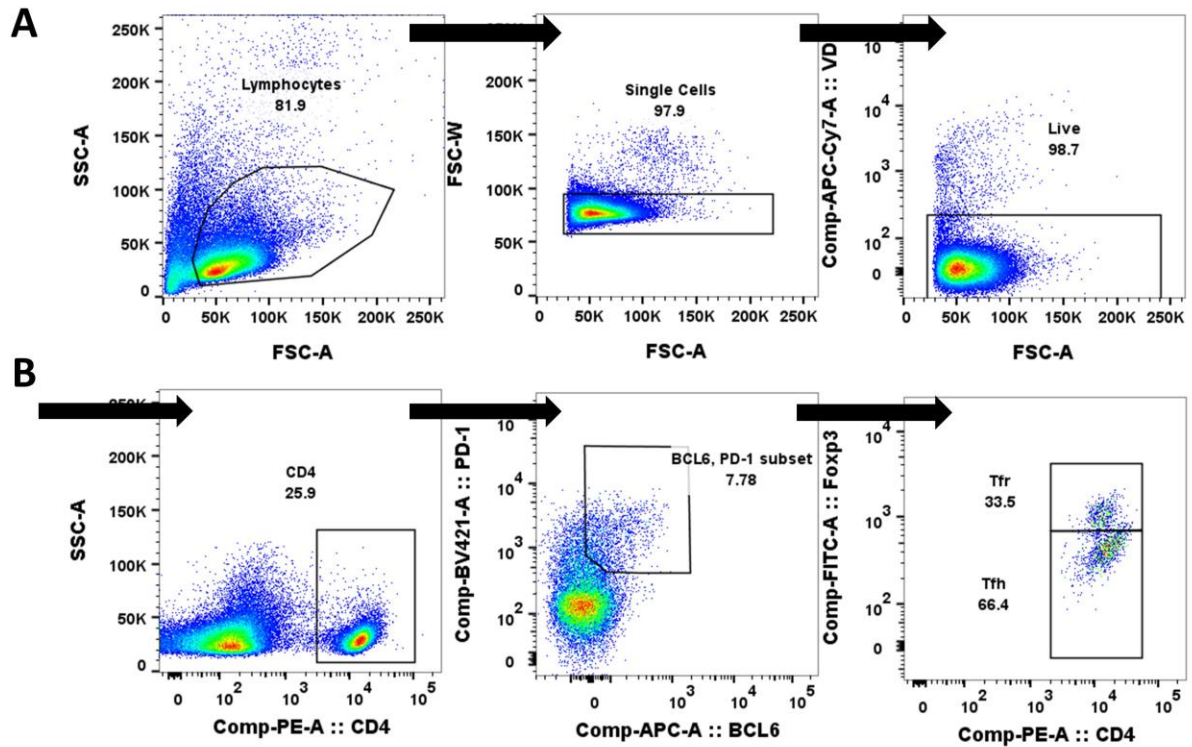

**Sup Fig. 1. Gating strategy. (A)** Live lymphocytes gating. Lymphocytes were gated based on side-scatter area (SSC-A) and forward scatter area (FSC-A), followed with single cells gating by FSC-W and FSC-A. Then live cells were identified by viability dye (VD) exclusion. **(B)** Gating for Tfh (follicular T helper) and Tfr (follicular regulatory T) cells. Among the live cells gated in **(A)**, the CD4<sup>+</sup> T cells were gated, following with BCL6<sup>+</sup> PD-1<sup>+</sup> follicular cells, among which the Foxp3<sup>-</sup> cells are identified as Tfh and Foxp3<sup>+</sup> as Tfr cells.

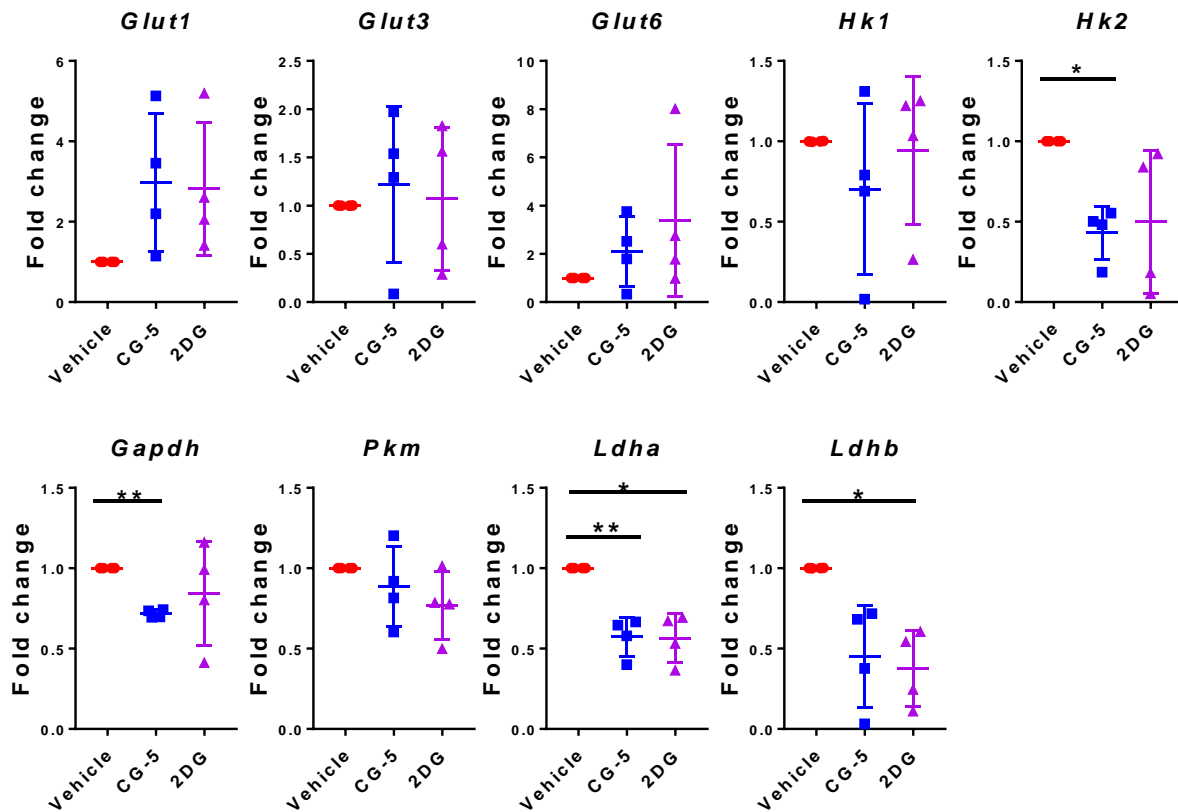

**Sup. Fig. 2. Glycolytic gene expression in CG-5 treated CD4<sup>+</sup> T cells.**

CD4<sup>+</sup> T cells from B6 mice were stimulated with anti-CD3/CD28 for 24 h with or without 4  $\mu$ M CG-5 or 0.2 mM 2DG. The relative expression of glycolytic genes was normalized to the vehicle-treated values in every single mouse. Results expressed as means  $\pm$  S.E.M from n = 4 per group compared with the vehicle-treated group using one-way ANOVA. \*: p < 0.05, \*\*: p < 0.01.

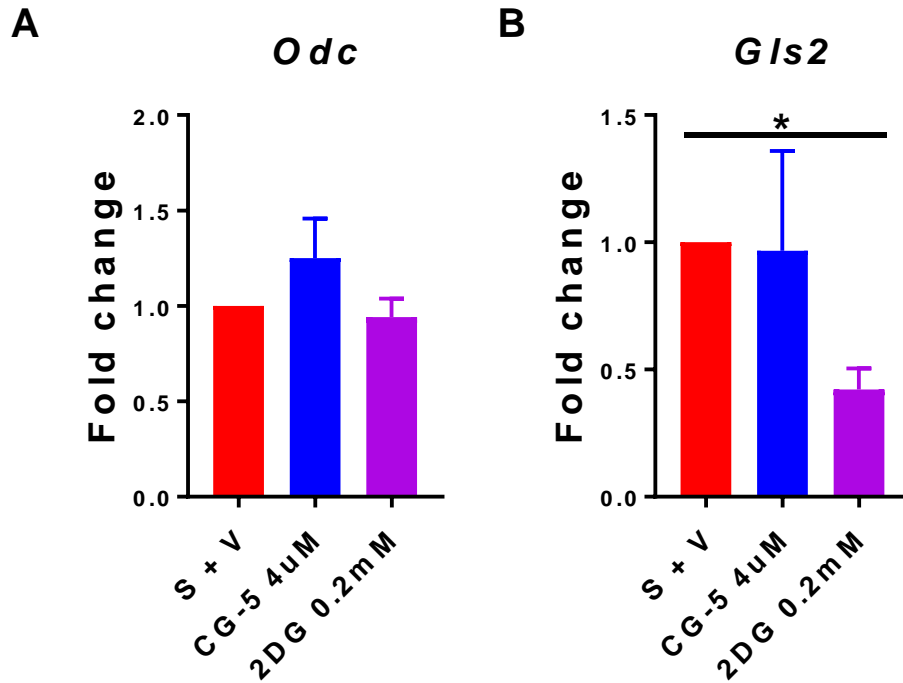

**Sup Fig. 3. Glutaminolysis gene expression in CG-5 treated CD4<sup>+</sup> T cells.** CD4<sup>+</sup> T cells from B6 mice were stimulated with anti-CD3/CD28 for 24 h with or without 4 uM CG-5 or 0.2 mM 2DG. The relative expression of *Odc* and *Gls2* was normalized to the vehicle-treated values in every single mouse. Results expressed as mean  $\pm$  S.E.M from n = 4 per group compared with the S + V group using one-way ANOVA. \*\*: p < 0.01.
